# Supplementary material for: A bimetallic oxide Fe1.89Mo4.11O7 electrocatalyst with highly efficient hydrogen evolution reaction activity in alkaline and acidic media
Source: Royal Society of Chemistry journal article supplement (doi:10.1039/c8sc01710g), 2018-01-01

## Supporting Information

### **Bimetallic Oxide $\text{Fe}_{1.89}\text{Mo}_{4.11}\text{O}_7$ Electrocatalyst with Highly Efficient Hydrogen Evolution Reaction Activity in Alkaline and Acidic Media**

Zhaomin Hao,<sup>a</sup> Shishuai Yang,<sup>a</sup> Jingyang Niu,<sup>a</sup> Zhiqiang Fang,<sup>a</sup> Liangliang Liu,<sup>b</sup> Qingsong Dong,<sup>\*,a</sup> Shuyan Song<sup>c</sup>, and Yong Zhao<sup>\*,b</sup>

*<sup>a</sup>Henan Key Laboratory of Polyoxometalate Chemistry, College of Chemistry and Chemical Engineering, Henan University, Kaifeng, 475004, Henan Province, P. R. China*

*<sup>b</sup>Key Lab for Special Functional Materials of Ministry of Education Collaborative Innovation Center of Nano Functional Materials and Applications, Henan University, Kaifeng, 475004, Henan Province, P. R. China*

*<sup>c</sup>State Key Laboratory of Rare Earth Resource Utilization, Changchun Institute of Applied Chemistry, Chinese Academy of Sciences, Changchun 130022, P. R. China*

\* Correspondence authors: [zmhao@henu.edu.cn](mailto:zmhao@henu.edu.cn), [zhaoyong@henu.edu.cn](mailto:zhaoyong@henu.edu.cn)

|                                                                                                                                                                                                                                                                                                                  |           |
|------------------------------------------------------------------------------------------------------------------------------------------------------------------------------------------------------------------------------------------------------------------------------------------------------------------|-----------|
| <b>Experimental Section</b> .....                                                                                                                                                                                                                                                                                | <b>3</b>  |
| Chemicals .....                                                                                                                                                                                                                                                                                                  | <b>3</b>  |
| Synthesis of precursors.....                                                                                                                                                                                                                                                                                     | <b>3</b>  |
| Synthesis of MoO <sub>2</sub> , Fe/MoO <sub>2</sub> and Fe <sub>1.89</sub> Mo <sub>4.11</sub> O <sub>7</sub> /MoO <sub>2</sub> .....                                                                                                                                                                             | <b>4</b>  |
| Characterization .....                                                                                                                                                                                                                                                                                           | <b>5</b>  |
| <b>Electrochemical characterization</b> .....                                                                                                                                                                                                                                                                    | <b>5</b>  |
| <b>Scheme S1 The synthesis route to prepare molybdenum-based nanomaterials</b> .....                                                                                                                                                                                                                             | <b>7</b>  |
| <b>Figure S1 The thermogravimetric studies</b> .....                                                                                                                                                                                                                                                             | <b>7</b>  |
| <b>Figure S2 The EDX elemental mapping images of Fe and Mo in Fe<sub>1.89</sub>Mo<sub>4.11</sub>O<sub>7</sub>/MoO<sub>2</sub></b> .....                                                                                                                                                                          | <b>8</b>  |
| <b>Figure S3 FESEM images of MoO<sub>2</sub> and Fe/MoO<sub>2</sub></b> .....                                                                                                                                                                                                                                    | <b>8</b>  |
| <b>Figure S4 HRTEM image of Fe<sub>1.89</sub>Mo<sub>4.11</sub>O<sub>7</sub>/MoO<sub>2</sub> sample</b> .....                                                                                                                                                                                                     | <b>9</b>  |
| <b>Figure S5 Polarization curves of Fe<sub>1.89</sub>Mo<sub>4.11</sub>O<sub>7</sub>/MoO<sub>2</sub> with different loadings</b> .....                                                                                                                                                                            | <b>9</b>  |
| <b>Figure S6 Polarization curves of Fe<sub>1.89</sub>Mo<sub>4.11</sub>O<sub>7</sub>/MoO<sub>2</sub> prepared with different annealing temperature</b> .....                                                                                                                                                      | <b>10</b> |
| <b>Figure S7 XRD patterns of Fe<sub>1.89</sub>Mo<sub>4.11</sub>O<sub>7</sub>/MoO<sub>2</sub> prepared with different annealing temperature</b> .....                                                                                                                                                             | <b>10</b> |
| <b>Figure S8 The onset potential of Fe<sub>1.89</sub>Mo<sub>4.11</sub>O<sub>7</sub>/MoO<sub>2</sub> catalyst in 1 M KOH</b> .....                                                                                                                                                                                | <b>11</b> |
| <b>Figure S9 The onset potential of Fe<sub>1.89</sub>Mo<sub>4.11</sub>O<sub>7</sub>/MoO<sub>2</sub> catalyst in 0.5 M H<sub>2</sub>SO<sub>4</sub></b> .....                                                                                                                                                      | <b>11</b> |
| <b>Figure S10 The Tafel plots in 1 M KOH</b> .....                                                                                                                                                                                                                                                               | <b>12</b> |
| <b>Figure S11 The exchange current density of Fe<sub>1.89</sub>Mo<sub>4.11</sub>O<sub>7</sub>/MoO<sub>2</sub> catalyst in 1 M KOH</b> ...                                                                                                                                                                        | <b>12</b> |
| <b>Figure S12 The Tafel plots in 0.5 M H<sub>2</sub>SO<sub>4</sub></b> .....                                                                                                                                                                                                                                     | <b>13</b> |
| <b>Figure S13 The exchange current density of Fe<sub>1.89</sub>Mo<sub>4.11</sub>O<sub>7</sub>/MoO<sub>2</sub> catalyst 0.5 M H<sub>2</sub>SO<sub>4</sub></b> ..                                                                                                                                                  | <b>13</b> |
| <b>Table S1 The HER performance of catalysts in this paper</b> .....                                                                                                                                                                                                                                             | <b>14</b> |
| <b>Table S2 Comparison of HER performance for Fe<sub>1.89</sub>Mo<sub>4.11</sub>O<sub>7</sub>/MoO<sub>2</sub> with other HER electrocatalysts</b> .....                                                                                                                                                          | <b>15</b> |
| <b>Figure S14 Polarization curves of Fe<sub>1.89</sub>Mo<sub>4.11</sub>O<sub>7</sub>/MoO<sub>2</sub> after continuous potential sweeps at 20 mV s<sup>-1</sup></b> .....                                                                                                                                         | <b>16</b> |
| <b>Figure S15 Time-dependent current density curves (carbon as a counter electrode) of the Fe<sub>1.89</sub>Mo<sub>4.11</sub>O<sub>7</sub>/MoO<sub>2</sub> in 1 M KOH</b> .....                                                                                                                                  | <b>16</b> |
| <b>Figure S16 The HRTEM images for Fe<sub>1.89</sub>Mo<sub>4.11</sub>O<sub>7</sub>/MoO<sub>2</sub> in 1 M KOH and 0.5 M H<sub>2</sub>SO<sub>4</sub> after 3000 potential sweeps</b> .....                                                                                                                        | <b>17</b> |
| <b>Figure S17 The DFT calculation of metal-hydrogen bond strength based on Mo and Fe element in Fe<sub>1.89</sub>Mo<sub>4.11</sub>O<sub>7</sub></b> .....                                                                                                                                                        | <b>17</b> |
| <b>Figure S18 Optimized structure of Fe<sub>1.89</sub>Mo<sub>4.11</sub>O<sub>7</sub>/Fe<sub>1.89</sub>Mo<sub>4.11</sub>O<sub>7</sub>-H, MoO<sub>2</sub>/MoO<sub>2</sub>-H, Mo<sub>5</sub>O<sub>14</sub>/Mo<sub>5</sub>O<sub>14</sub>-H and Mo<sub>8</sub>O<sub>23</sub>/Mo<sub>8</sub>O<sub>23</sub>-H</b> ..... | <b>18</b> |

## Experimental Section

### Chemicals

All chemical reagents were used as received without further purification.

### Synthesis of precursors

**Ferrimolybdate:** The solution of  $\text{H}_3[\text{PMo}_{12}\text{O}_{40}]\cdot\text{XH}_2\text{O}$ , 1,10-phen,  $\text{Fe}_2\text{O}_3$ ,  $\text{NH}_4\text{VO}_3$ , triethylamine and distilled water in a molar ratio of 1 : 1.5 : 1 : 0.5 : 2 : 1000 was stirred for 1h, and the pH value of solution was adjusted to 5.0 by 2 mol  $\text{L}^{-1}$  HCl solution. The mixture was then transferred into a Teflon-lined autoclave reactor (20 mL) at 175 °C for 5 days. The reactor was slowly cooled to room temperature. The resulted red-black block crystals were filtered, washed with water, and dried at room temperature. Anal. Calcd: C, 21.19; H, 1.17; N, 4.12; Fe, 4.12. Found: C, 21.74; H, 1.76; N, 4.01; Fe, 4.08. The crystal structure of ferrimolybdate was checked by single crystal X-ray diffractometer before it was used as precursor.

**Polymolybdate:**  $(\text{NH}_4)_6\text{Mo}_7\text{O}_{24}\cdot 4\text{H}_2\text{O}$ , 1,10-phen,  $\text{H}_3\text{PO}_4$  and distilled water in a molar ratio of 1 : 0.05 : 0.1 : 2 : 1000 were mixed. The resulting suspension was stirred for 30min and then was transferred into a Teflon-lined autoclave reactor (20 mL). After heating at 170 °C for 3 days, the reactor was slowly cooled to room temperature. Yellow block crystals were filtered, washed with water, and dried at room temperature. Anal. Calcd: C, 18.31; H, 1.08; N, 3.55. Found: C, 18.28; H, 1.17; N, 3.56. The crystal structure of ferrimolybdate was checked by single crystal X-ray diffractometer before it was used as precursor.

### **Synthesis of MoO<sub>2</sub>, Fe/MoO<sub>2</sub> and Fe<sub>1.89</sub>Mo<sub>4.11</sub>O<sub>7</sub>/MoO<sub>2</sub>**

**MoO<sub>2</sub>:** 0.5 g polymolybdates powder was homogeneously dispersed in a ceramic boat that was then put into a tube furnace. The sample was annealed under a continuous nitrogen flux of 10 sccm at 1000 °C for 1 hour, and then the ceramic boat was slowly cooled to room temperature. After the annealing was completed, the powders were collected. The heat-treated MoO<sub>2</sub> was then pre-leached in 0.5 M H<sub>2</sub>SO<sub>4</sub> at 40 °C for 8 hours to remove unstable and inactive species from the catalyst, and thoroughly washed in de-ionized water. Finally, the catalyst was heat-treated again at nitrogen-gas atmosphere for 1 hour to get the final MoO<sub>2</sub>.

**Fe/MoO<sub>2</sub>:** 0.5 g polymolybdates and 0.533 g Fe(NO<sub>3</sub>)<sub>3</sub>·9H<sub>2</sub>O were homogeneously mixed and then dispersed in a ceramic boat. Next, the samples were annealed in a tube furnace under a continuous nitrogen flux of 10 sccm at 1000 °C for 1 hour, and then the ceramic boat was slowly cooled to room temperature. The heat-treated Fe/MoO<sub>2</sub> was then pre-leached in 0.5 M H<sub>2</sub>SO<sub>4</sub> at 40 °C for 8 hours to remove unstable and inactive species from the catalyst, and thoroughly washed in de-ionized water. Finally, the catalyst was heat-treated again in nitrogen-gas atmosphere for 1 hour to get the final Fe/MoO<sub>2</sub>.

**Fe<sub>1.89</sub>Mo<sub>4.11</sub>O<sub>7</sub>/MoO<sub>2</sub>:** 0.5 g Ferrimolybdate powder was homogeneously dispersed in a ceramic boat that was then put into a tube furnace. The samples were annealed under a continuous nitrogen flux of 10 sccm at 1000 °C for 1 hour, and then the ceramic boat was slowly cooled to room temperature. After the annealing was completed, the powders were collected. The heat-treated Fe<sub>1.89</sub>Mo<sub>4.11</sub>O<sub>7</sub>/MoO<sub>2</sub> was then pre-leached in 0.5 M H<sub>2</sub>SO<sub>4</sub> at 40 °C for 8 hours to remove unstable and inactive species from the catalyst, and thoroughly washed in de-ionized water. Finally, the catalyst was heat-treated again in nitrogen-gas atmosphere for 1 hour to get the final Fe<sub>1.89</sub>Mo<sub>4.11</sub>O<sub>7</sub>/MoO<sub>2</sub>.

## Characterization

Powder X-ray diffraction (XRD) measurement was performed on a Bruker D8 Focus Powder X-ray diffractometer using Cu K $\alpha$  ( $\lambda = 0.15405$  nm) radiation (40 kV, 40 mA). X-ray photoelectron spectra (XPS) was measured with VG ESCALAB MK (VK Company, UK) at room temperature by using a Al K $\alpha$  X-ray source at 12 KV and 20 mA. The morphology of the nickel sulfide was analyzed by on a JSM-6701Feld-emission scanning electron microscope (FE-SEM) with 10KV and 10mA. Energy dispersive spectroscopy (EDS) data was collected with an ensemble measurement in the FE-SEM. Transmission electron microscope (TEM) was performed using a FEI Tecnai G2 S-Twin instrument with a field emission gun operating at 200 kV. Nitrogen adsorption measurements were performed on a Micromeritics ASAP 2020 adsorption analyzer. Specific surface areas were calculated by the Brunauer-Emmert-Teller method. Mass analysis of the generated gases was performed using an Ominstar-Thermostar GSD 320 system (Pfeiffer Vacuum) mass spectrometer, wherein argon gas was chosen as carrier gas. The electrochemical experiments were carried out with a ModuLab XM electrochemical workstation (Solartron Analytical, UK).

## Electrochemical characterization

Electrochemical measurements were performed at room temperature in a standard three-electrode system. A platinum gauze electrode and a saturated calomel electrode (SCE) served as the counter electrode and the reference electrode, respectively. The preparation of working electrode was described with the following procedures: 5 mg of catalyst powder was dispersed in diluted Nafion alcohol solution containing 1 mL ethanol and 50  $\mu$ L Nafion, and then ultrasonicated for 2 h to obtain a homogeneous suspension. Next, the suspension was homogeneously loaded on a bare carbon paste and dried at room temperature. Potentials were referenced to a reversible hydrogen electrode (RHE):  $E(\text{RHE}) = E(\text{SCE}) + 0.242 + 0.059 \times$

*p*H. Linear sweep voltammetry (LSV) was recorded in 1.0 M KOH and 0.5 M H<sub>2</sub>SO<sub>4</sub> at a scan rate of 5 mV s<sup>-1</sup> to obtain the polarization curves. The long-term stability tests were performed by continuous LSV scans at a sweep rate of 20 mV s<sup>-1</sup>.

# Scheme S1 The synthesis route to prepare molybdenum-based nanomaterials

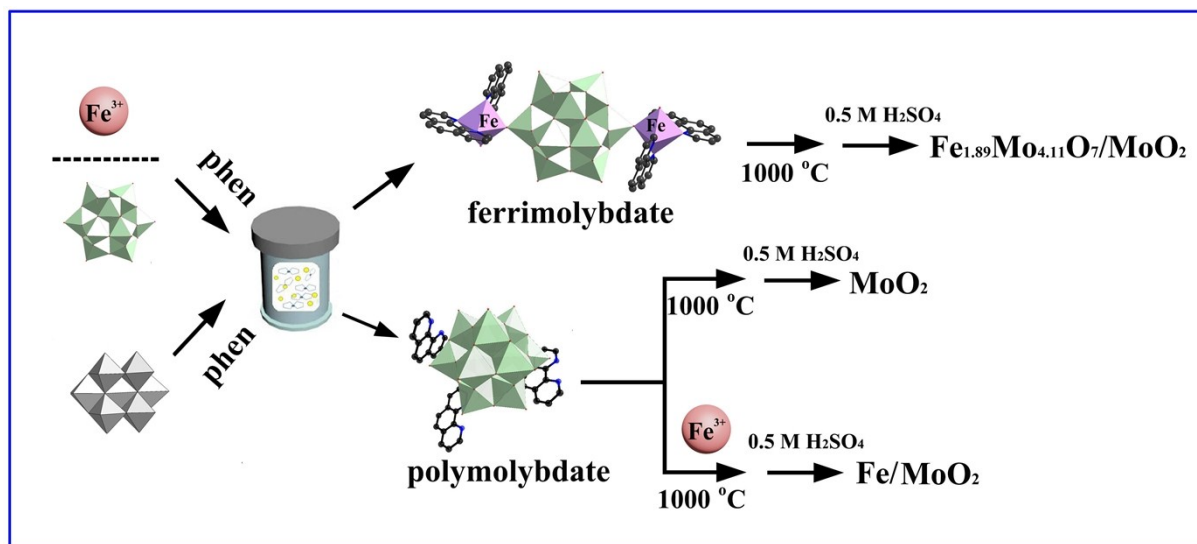

**Figure S1 The thermogravimetric studies:**  $\text{CO}_2$  signals detected by mass spectrum during the thermal treatment of ferrimolybdate, polymolybdates and polymolybdates +  $\text{Fe}^{3+}$

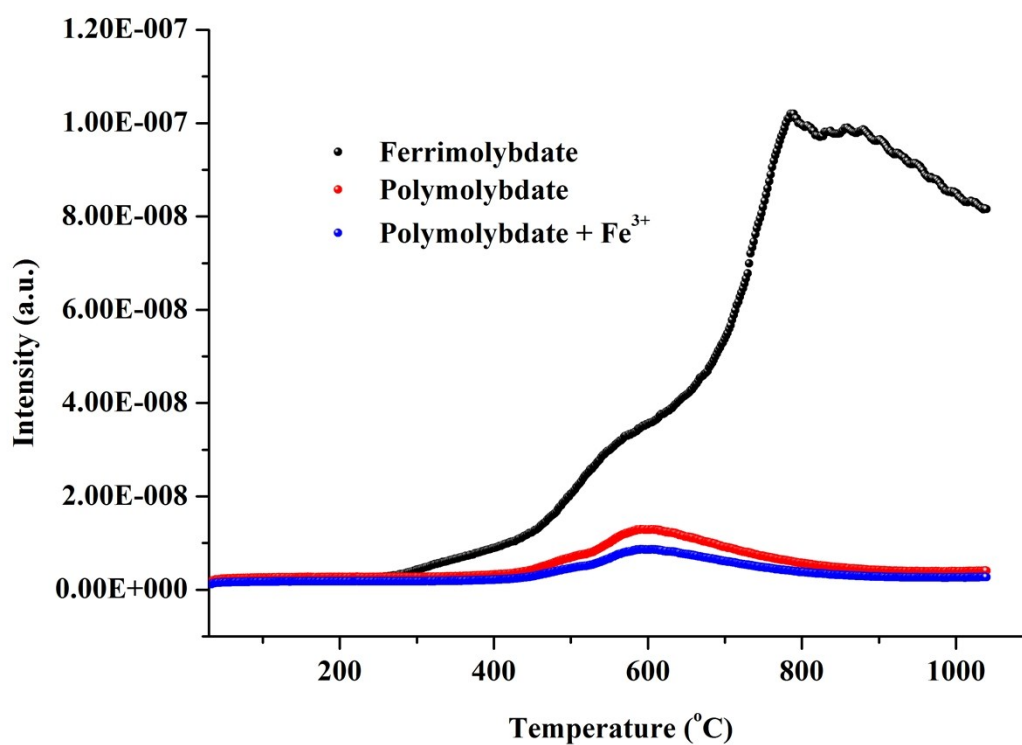

**Figure S2 The EDX elemental mapping images of Fe and Mo in**

**$\text{Fe}_{1.89}\text{Mo}_{4.11}\text{O}_7/\text{MoO}_2$**

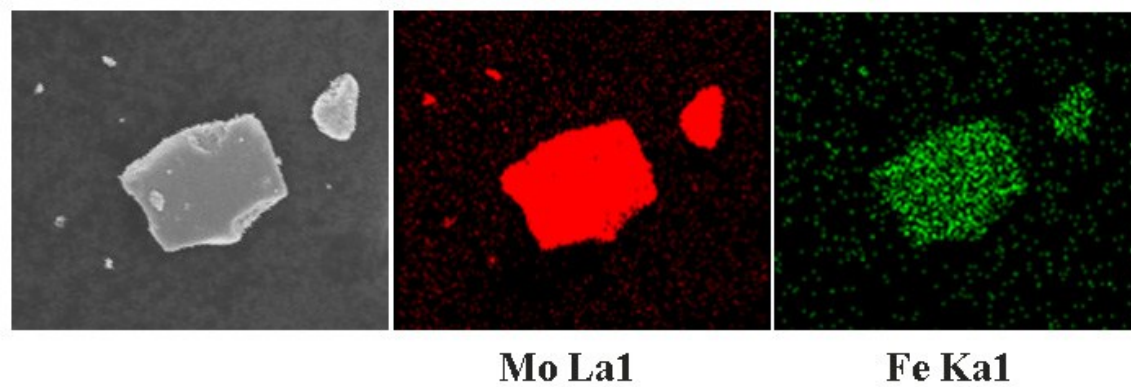

**Figure S3 FESEM images of  $\text{MoO}_2$  and  $\text{Fe}/\text{MoO}_2$  for a) precursors of  $\text{MoO}_2$ , b) precursors of  $\text{Fe}/\text{MoO}_2$ , c) final products of  $\text{MoO}_2$ , d) final products of  $\text{Fe}/\text{MoO}_2$ .**

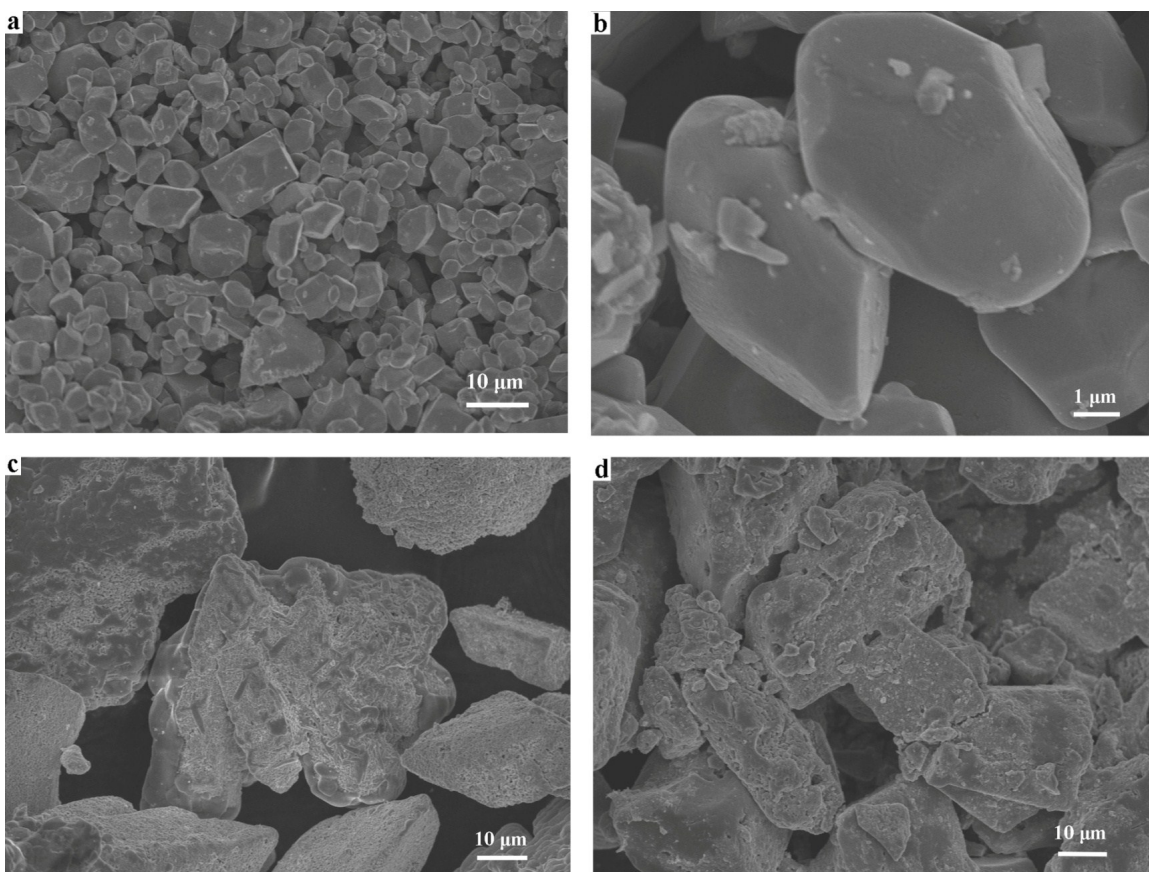



**Figure S4 HRTEM image of  $\text{Fe}_{1.89}\text{Mo}_{4.11}\text{O}_7/\text{MoO}_2$  sample.**

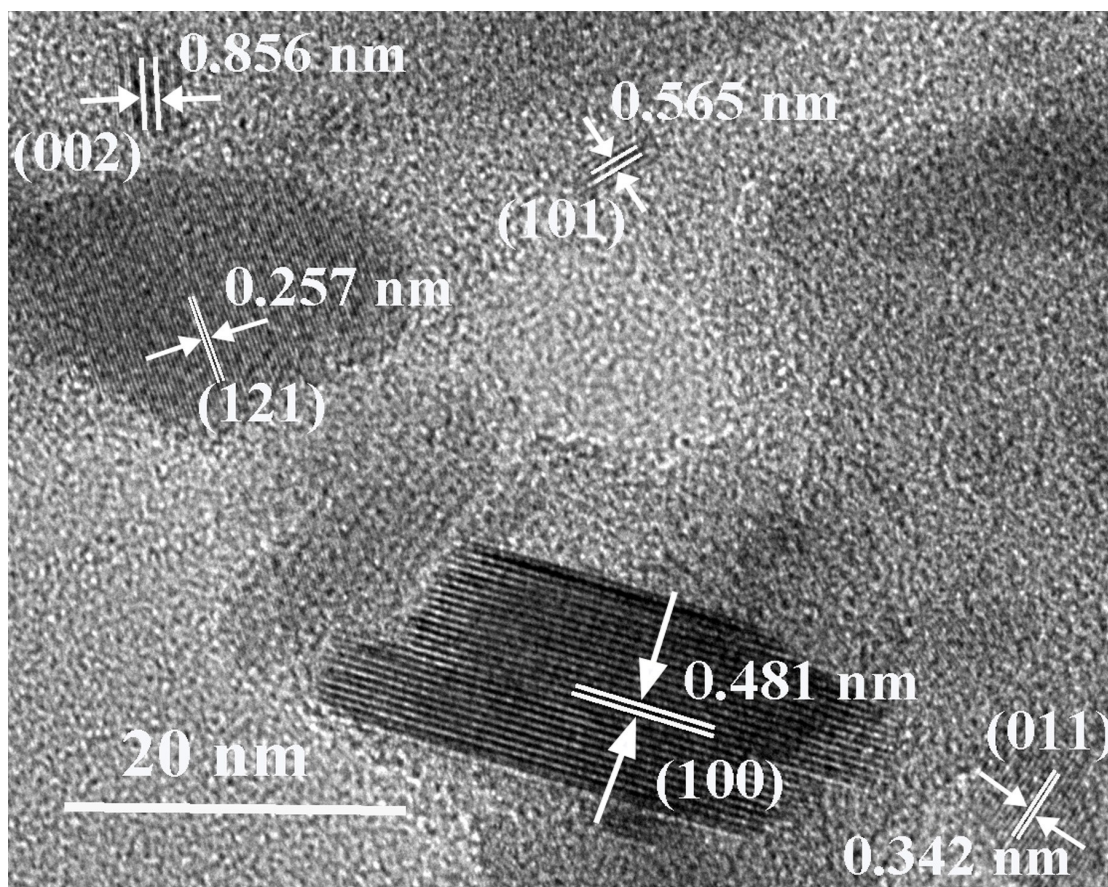

**Figure S5 Polarization curves of  $\text{Fe}_{1.89}\text{Mo}_{4.11}\text{O}_7/\text{MoO}_2$  with different loadings.**

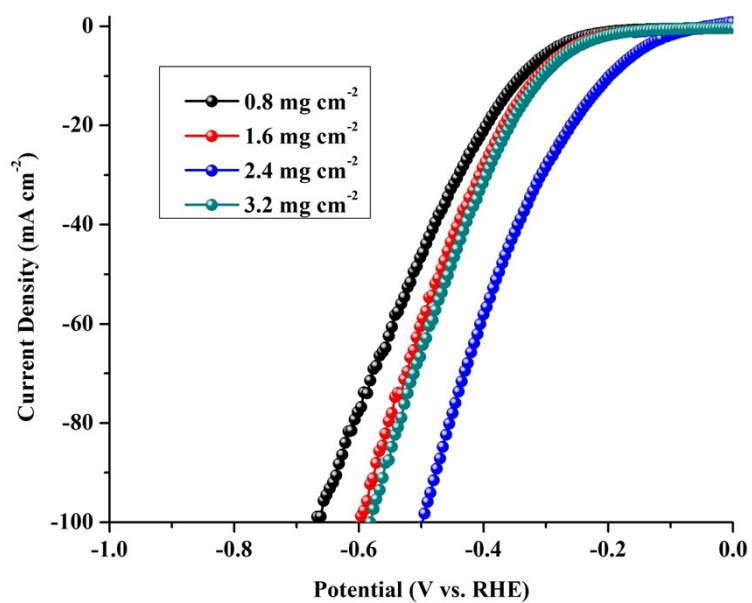

**Figure S6 Polarization curves of  $\text{Fe}_{1.89}\text{Mo}_{4.11}\text{O}_7/\text{MoO}_2$  prepared with different annealing temperature.**

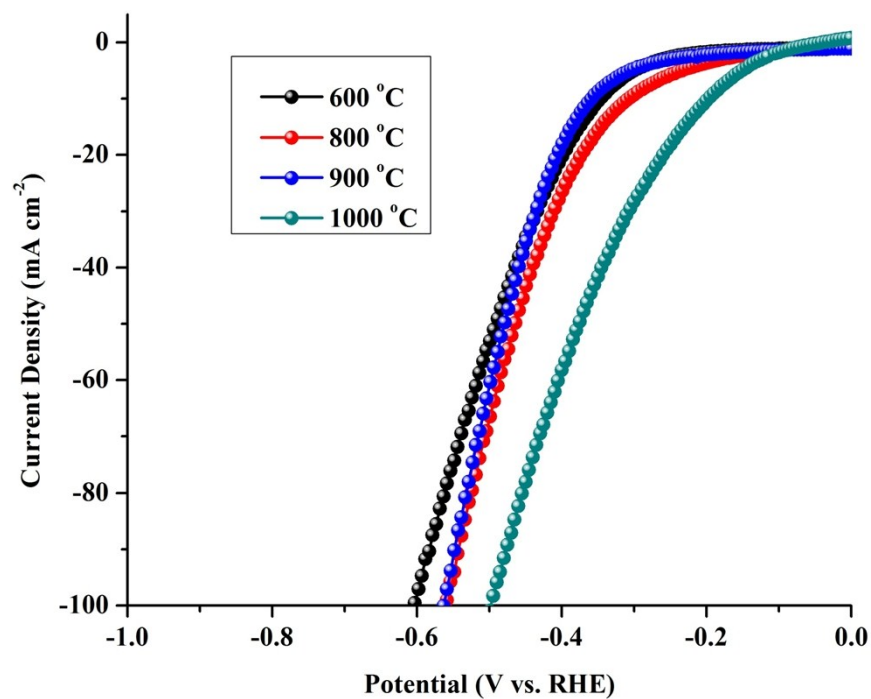

**Figure S7 XRD patterns of  $\text{Fe}_{1.89}\text{Mo}_{4.11}\text{O}_7/\text{MoO}_2$  prepared with different annealing temperature.**

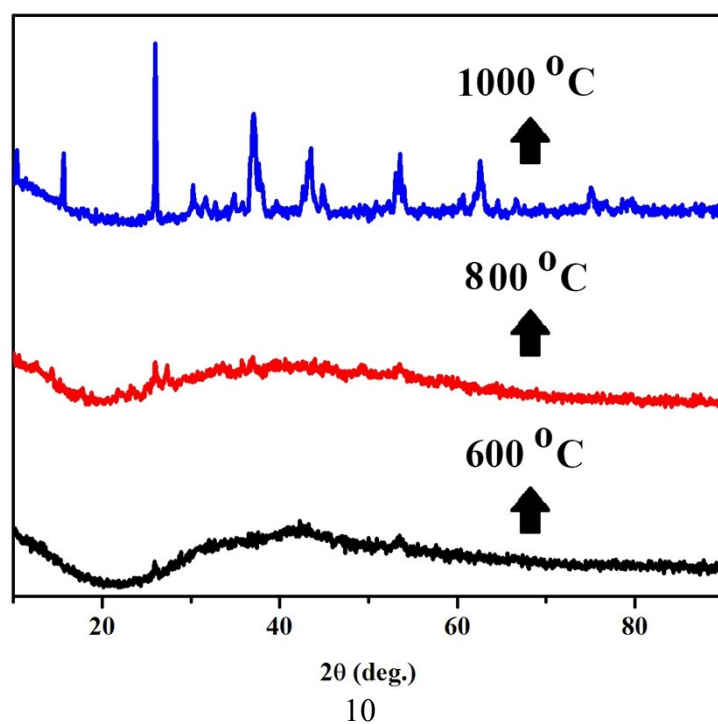

**Figure S8 The onset potential of  $\text{Fe}_{1.89}\text{Mo}_{4.11}\text{O}_7/\text{MoO}_2$  catalyst in 1 M KOH**

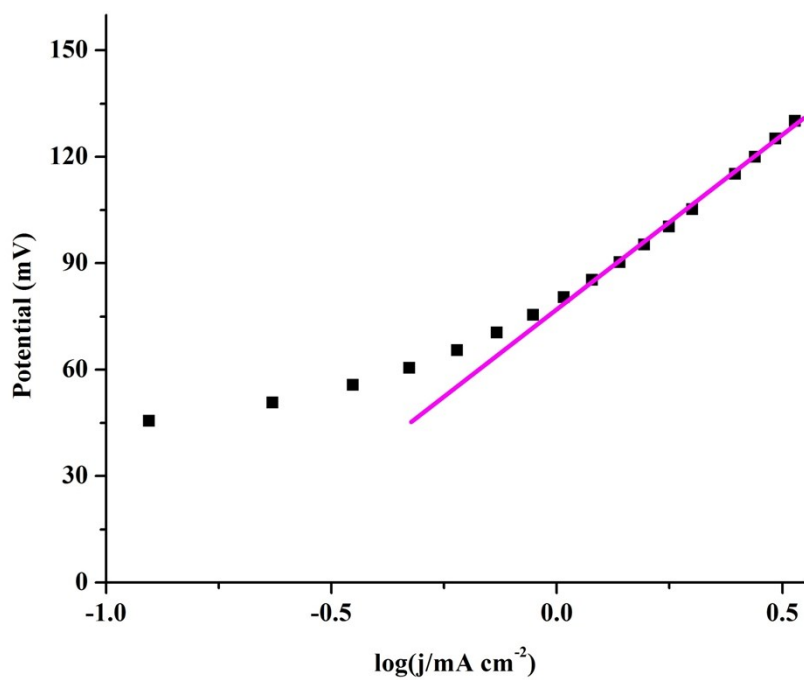

**Figure S9 The onset potential of  $\text{Fe}_{1.89}\text{Mo}_{4.11}\text{O}_7/\text{MoO}_2$  catalyst in 0.5 M  $\text{H}_2\text{SO}_4$**

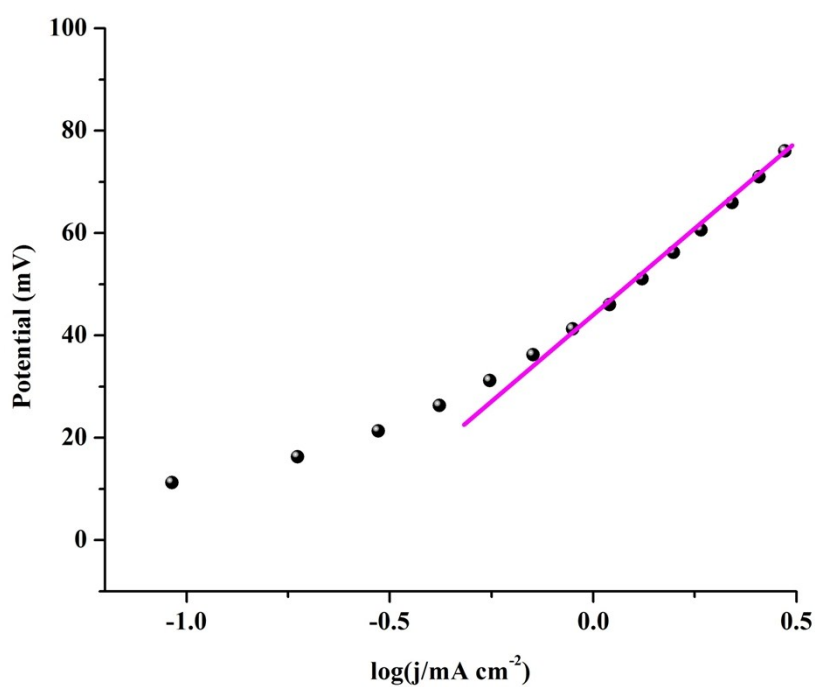

Figure S10 The Tafel plots in 1 M KOH

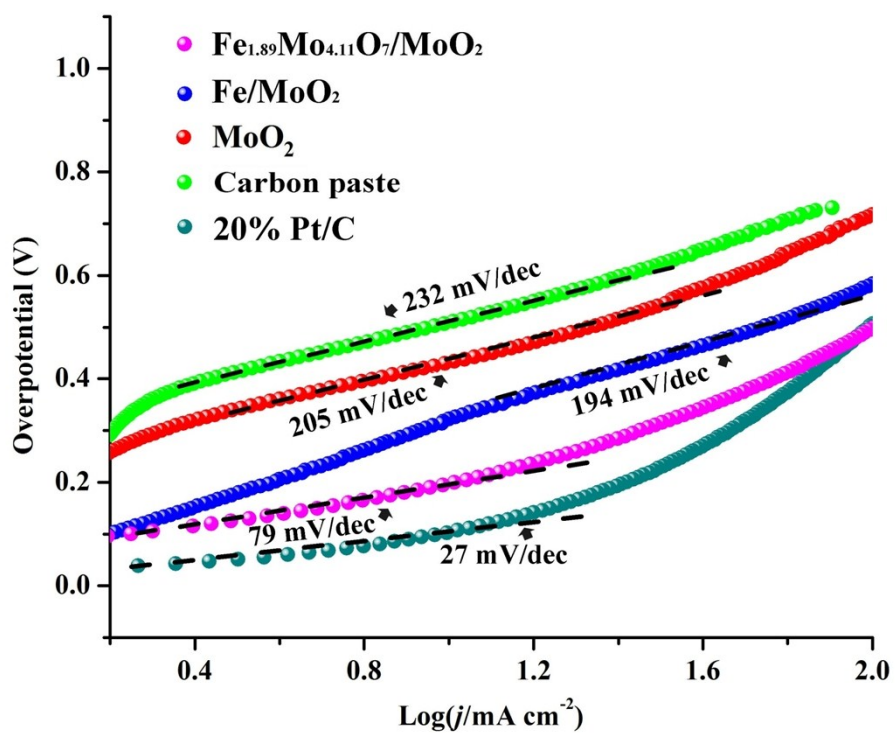

Figure S11 The exchange current density of  $\text{Fe}_{1.89}\text{Mo}_{4.11}\text{O}_7/\text{MoO}_2$  catalyst in 1 M KOH

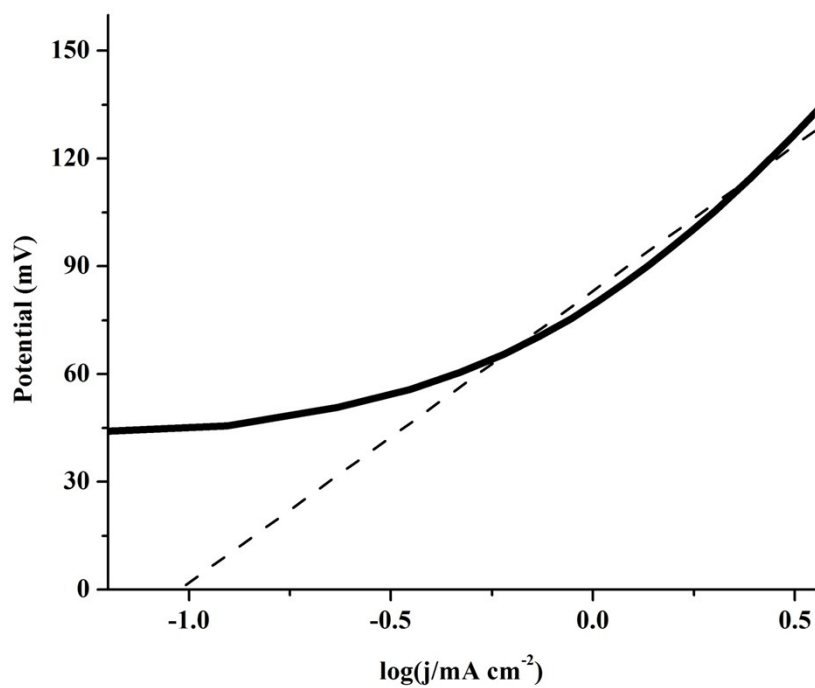

**Figure S12 The Tafel plots in 0.5 M H<sub>2</sub>SO<sub>4</sub>**

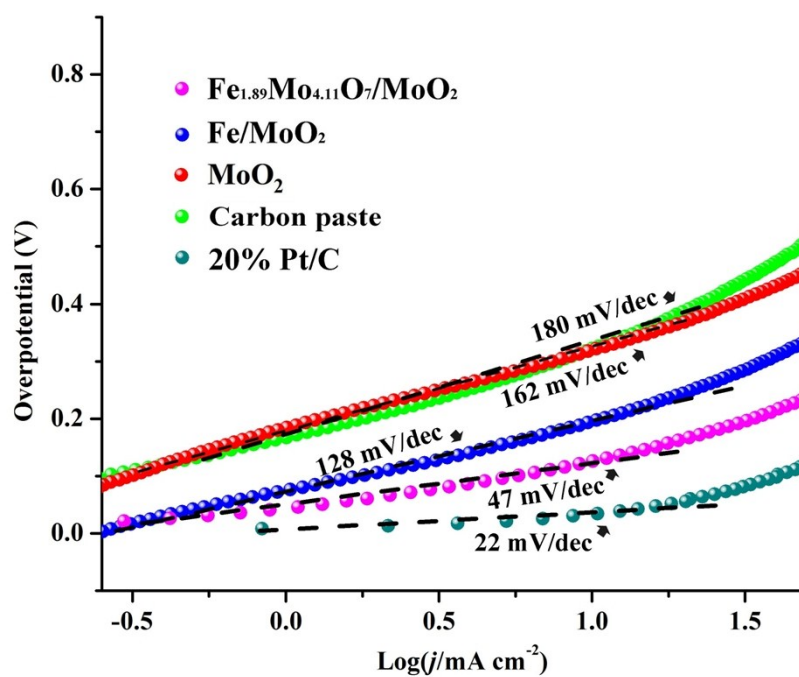

**Figure S13 The exchange current density of Fe<sub>1.89</sub>Mo<sub>4.11</sub>O<sub>7</sub>/MoO<sub>2</sub> catalyst**

**0.5 M H<sub>2</sub>SO<sub>4</sub>**

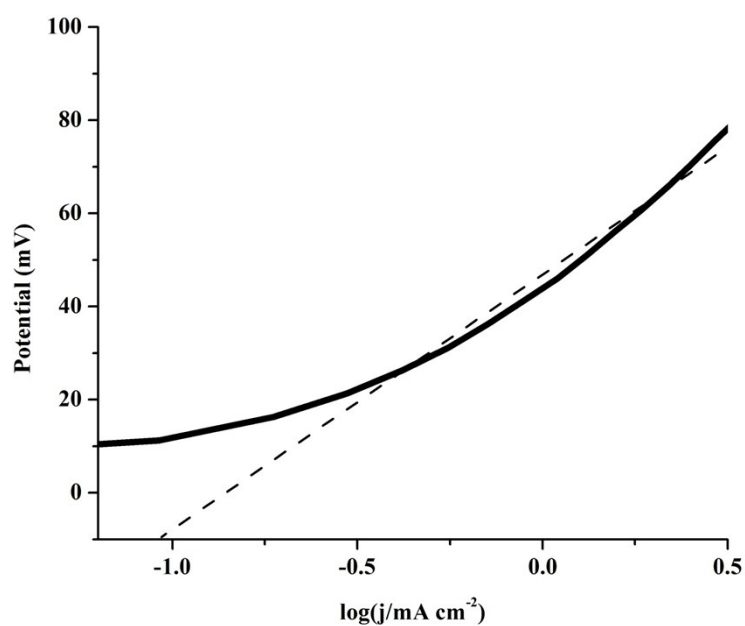

**Table S1 The HER performance of catalysts in this paper**

| Samples                                                                | Electrolyte                          | Tafel slope<br>(mV dec <sup>-1</sup> ) | $\eta$ (mV) at 10<br>mA cm <sup>-2</sup> |
|------------------------------------------------------------------------|--------------------------------------|----------------------------------------|------------------------------------------|
| Carbon paste                                                           | 1 M KOH                              | 232                                    | 514                                      |
|                                                                        | 0.5 M H <sub>2</sub> SO <sub>4</sub> | 180                                    | 321                                      |
| 20% Pt/C                                                               | 1 M KOH                              | 27                                     | 103                                      |
|                                                                        | 0.5 M H <sub>2</sub> SO <sub>4</sub> | 22                                     | 33                                       |
| MoO <sub>2</sub>                                                       | 1 M KOH                              | 205                                    | 431                                      |
|                                                                        | 0.5 M H <sub>2</sub> SO <sub>4</sub> | 162                                    | 318                                      |
| Fe/MoO <sub>2</sub>                                                    | 1 M KOH                              | 194                                    | 322                                      |
|                                                                        | 0.5 M H <sub>2</sub> SO <sub>4</sub> | 128                                    | 194                                      |
| Fe <sub>1.89</sub> Mo <sub>4.11</sub> O <sub>7</sub> /MoO <sub>2</sub> | 1 M KOH                              | 79                                     | 197                                      |
|                                                                        | 0.5 M H <sub>2</sub> SO <sub>4</sub> | 47                                     | 125                                      |



**Table S2 Comparison of HER performance for Fe<sub>1.89</sub>Mo<sub>4.11</sub>O<sub>7</sub>/MoO<sub>2</sub> with other HER electrocatalysts**

| Samples                                                                | Electrolyte                          | Onset $\eta$ (mV) | Tafel slope (mV dec <sup>-1</sup> ) | $\eta$ (mV) at 10 mA cm <sup>-2</sup> | Ref.                                                        |
|------------------------------------------------------------------------|--------------------------------------|-------------------|-------------------------------------|---------------------------------------|-------------------------------------------------------------|
| Double-gyroid MoS <sub>2</sub> /FTO                                    | 0.5 M H <sub>2</sub> SO <sub>4</sub> | 200–150           | 50                                  | 240                                   | <i>Nat. Mater.</i> <b>2012</b> , <i>11</i> , 963            |
| MoS <sub>2</sub> /CoSe <sub>2</sub> hybrid                             | 0.5 M H <sub>2</sub> SO <sub>4</sub> | 11                | 36                                  | 68                                    | <i>Nat. Commun.</i> <b>2015</b> , <i>6</i> , 5982           |
| Exfoliated metallic MoS <sub>2</sub> nanosheets                        | 0.1 M H <sub>2</sub> SO <sub>4</sub> | 135               | 43                                  | 187                                   | <i>Nat. Mater.</i> <b>2013</b> , <i>12</i> , 850.           |
| MoO <sub>3</sub> -MoS <sub>2</sub>                                     | 0.5 M H <sub>2</sub> SO <sub>4</sub> | 200               | 50-60                               | 250                                   | <i>Nano Lett.</i> <b>2011</b> , <i>11</i> , 4168            |
| NiMoN <sub>x</sub> /C                                                  | 0.1 M HClO <sub>4</sub>              | 78                | 35.9                                | 170                                   | <i>Angew. Chem. Int. Ed.</i> <b>2012</b> , <i>51</i> , 6131 |
| MoS <sub>2</sub> /RGO                                                  | 0.5 M H <sub>2</sub> SO <sub>4</sub> | 100               | 41                                  | 140                                   | <i>J. Am. Chem. Soc.</i> <b>2011</b> , <i>133</i> , 7296.   |
| MoO <sub>2</sub> /MoSe <sub>2</sub>                                    | 0.5 M H <sub>2</sub> SO <sub>4</sub> | 63                | 49.1                                | 181                                   | <i>Adv. Funct. Mater.</i> <b>2016</b> , <i>26</i> , 8537    |
| MoSe <sub>2</sub> /Mo                                                  | 0.5 M H <sub>2</sub> SO <sub>4</sub> | 89                | 34.7                                | 166                                   | <i>Adv. Mater.</i> <b>2016</b> , <i>28</i> , 9831.          |
| Co-Mo-S <sub>x</sub>                                                   | 0.1 M KOH                            |                   |                                     | >200                                  | <i>Nat. Mater.</i> <b>2016</b> , <i>15</i> , 197            |
|                                                                        | 0.1 M HClO <sub>4</sub>              |                   |                                     | >200                                  |                                                             |
| Fe <sub>1.89</sub> Mo <sub>4.11</sub> O <sub>7</sub> /MoO <sub>2</sub> | 1 M KOH                              | 70                | 79                                  | 197                                   | This work                                                   |
|                                                                        | 0.5 M H <sub>2</sub> SO <sub>4</sub> | 40                | 47                                  | 125                                   |                                                             |

**Figure S14 Polarization curves of  $\text{Fe}_{1.89}\text{Mo}_{4.11}\text{O}_7/\text{MoO}_2$  after continuous potential sweeps at  $20 \text{ mV s}^{-1}$**

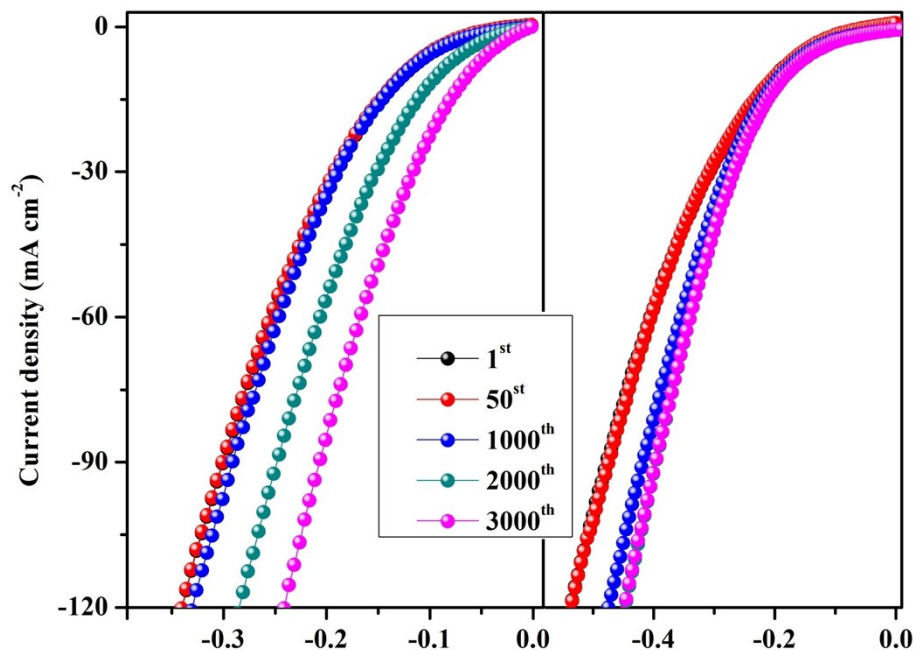

**Figure S15 Time-dependent current density curves (carbon as a counter electrode) of the  $\text{Fe}_{1.89}\text{Mo}_{4.11}\text{O}_7/\text{MoO}_2$  in 1 M KOH**

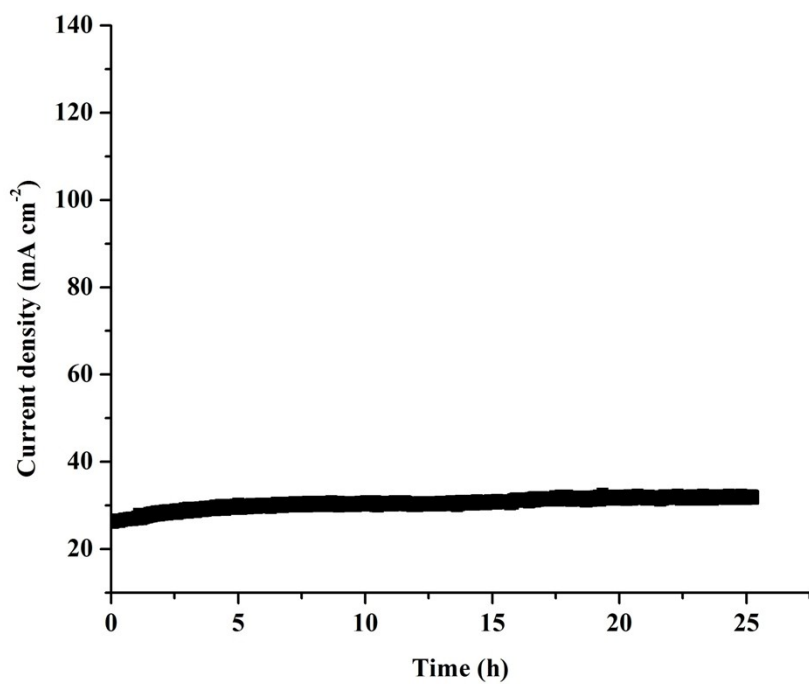



**Figure S16** The HRTEM images for  $\text{Fe}_{1.89}\text{Mo}_{4.11}\text{O}_7/\text{MoO}_2$  in 1 M KOH and 0.5 M  $\text{H}_2\text{SO}_4$  after 3000 potential sweeps

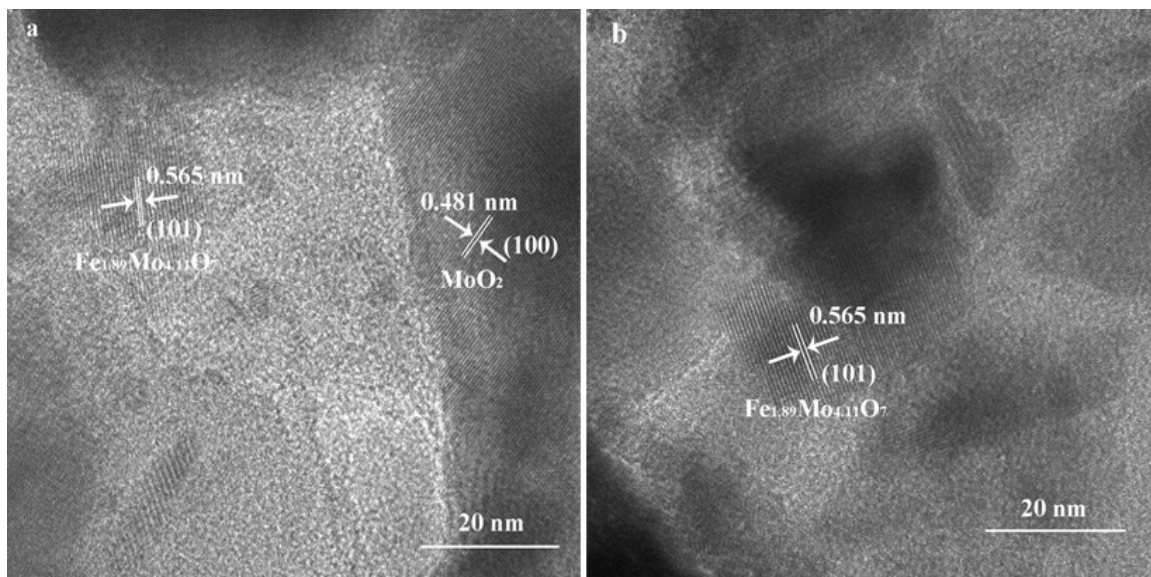

**Figure S17** The DFT calculation of metal-hydrogen bond strength based on Mo and Fe element in  $\text{Fe}_{1.89}\text{Mo}_{4.11}\text{O}_7$ .

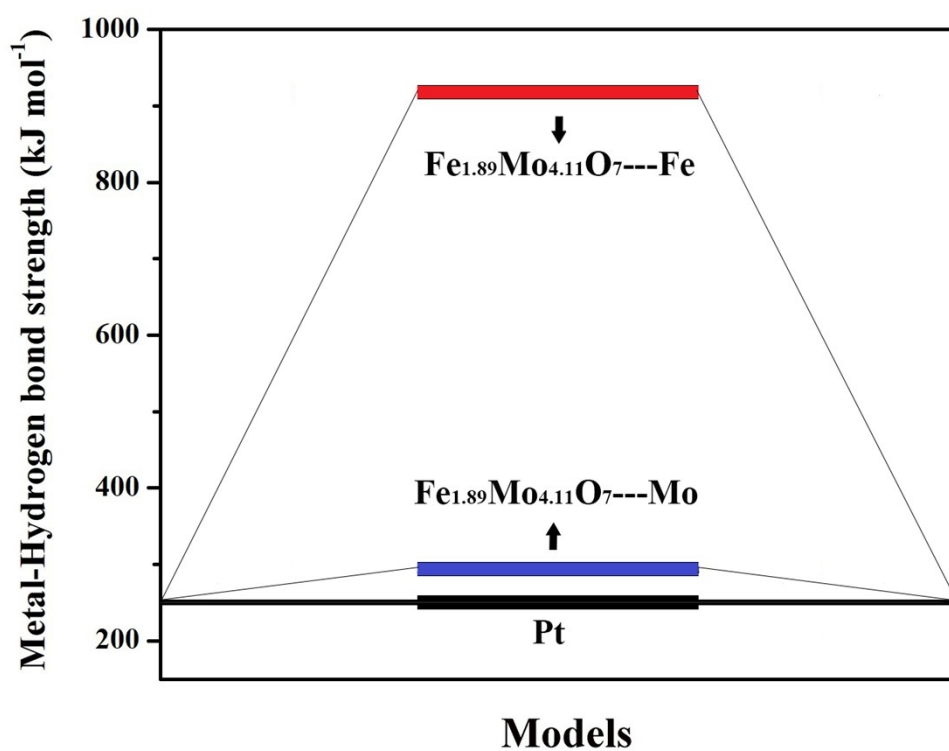

**Figure S18 Optimized structure of  $\text{Fe}_{1.89}\text{Mo}_{4.11}\text{O}_7/\text{Fe}_{1.89}\text{Mo}_{4.11}\text{O}_7\text{-H}$ ,  $\text{MoO}_2$   
/ $\text{MoO}_2\text{-H}$ ,  $\text{Mo}_5\text{O}_{14}/\text{Mo}_5\text{O}_{14}\text{-H}$  and  $\text{Mo}_8\text{O}_{23}/\text{Mo}_8\text{O}_{23}\text{-H}$ .**

We perform DFT calculation using the Vienna Ab Initio Simulation Package (VASP), the Perdew-Becke-Ernzerhof (PBE) is used for the exchange-correlation functional. The cut-off energies for plane waves is 450 eV, providing a convergence of  $10^{-4}$  eV in total energy and 0.02 eV/Å in Hellmann Feynman force on each atom. The metal-hydrogen bond strength in  $\text{Fe}_{1.89}\text{Mo}_{4.11}\text{O}_7$  is calculated to state the Mo active sites with  $\text{MoO}_2$ ,  $\text{Mo}_5\text{O}_{14}$  and  $\text{Mo}_8\text{O}_{23}$ . All adsorption sites were based on Mo for comparison, and all initial structures and optimized intermediates were listed as following.

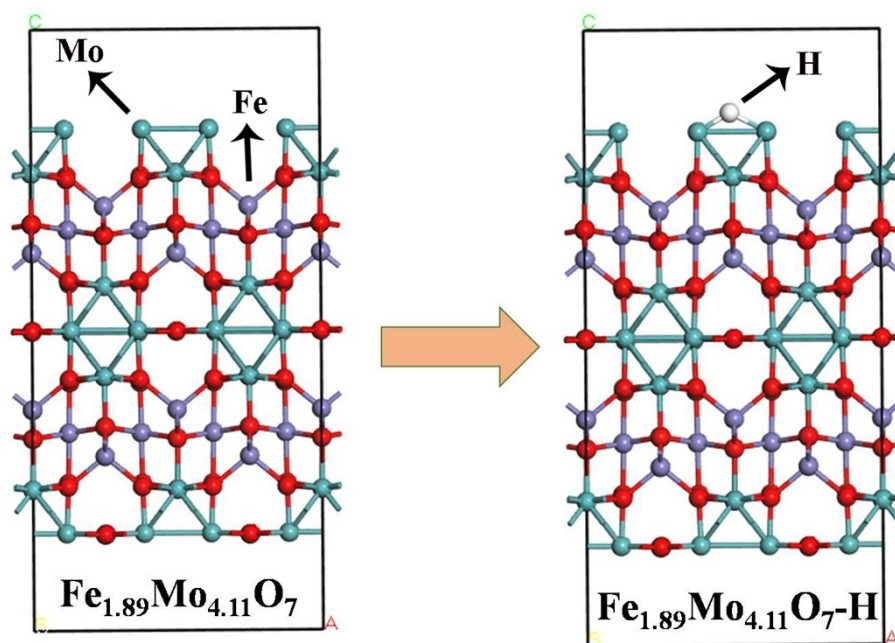

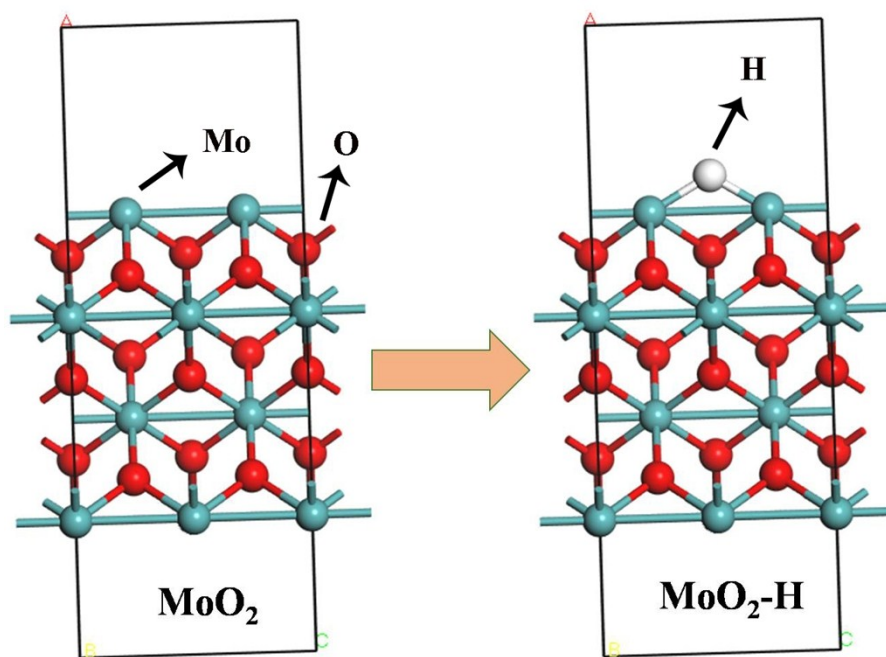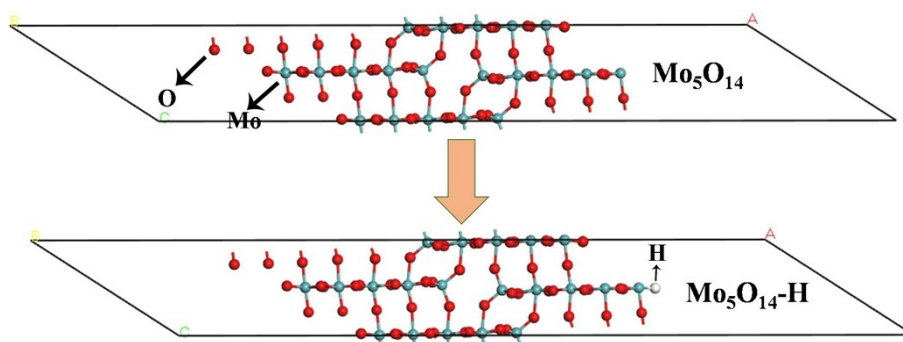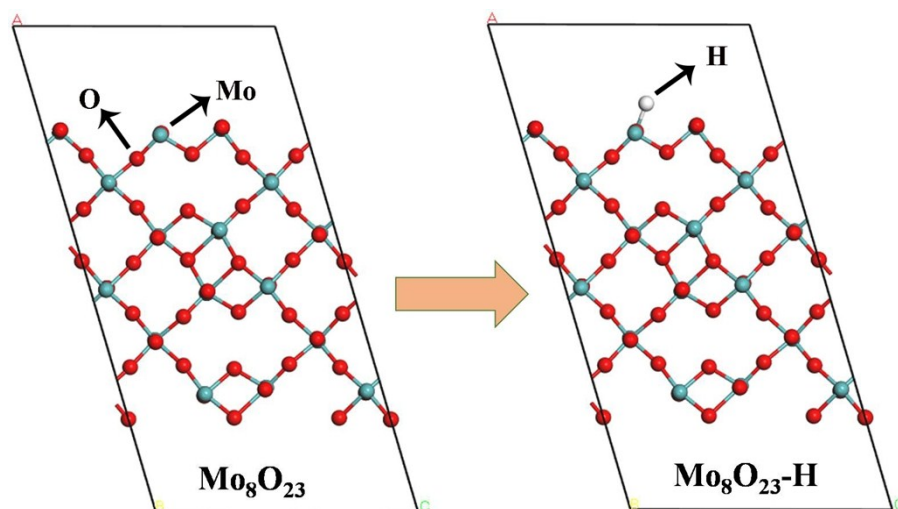

Supplement: c8sc01710g1.pdf [file c8sc01710g1.pdf]
